# Supplementary material
Source: publisher figshare collection journal article supplement (https://asha.figshare.com/articles/dataset/_/19233297)
Supplement: Supplementary file 1 [file 1]

**Supplemental Material S2.** Regression models for MoCA scores examining the interaction between sex and hearing in the better ear (based on pure-tone average of thresholds at 500, 1000, 2000, and 4000 Hz in the better ear). \* $p < .05$ .

| MoCA Score              | Model 1  |                 |          | Model 2  |                |          |
|-------------------------|----------|-----------------|----------|----------|----------------|----------|
|                         | <i>B</i> | 95% CI          | <i>t</i> | <i>B</i> | 95% CI         | <i>t</i> |
| Age                     | -0.007   | -0.074 – 0.060  | -0.202   | -.003    | -.067 – .060   | -0.100   |
| Education               | 0.041    | -0.070 – 0.152  | 0.732    | .035     | -.076 – .142   | 0.624    |
| Depression Status       | 0.138    | -0.948 – 1.225  | 0.251    | .139     | -.948 – 1.200  | 0.254    |
| Sex                     | -1.026   | -1.729 – -0.324 | -2.884*  | -2.864   | -5.013 – -.718 | -2.508*  |
| PTA better ear          | -0.044   | -0.098 – 0.011  | -1.582   | -.085    | -.153 – -.016  | -2.313*  |
| Sex by PTA              | —        | —               | —        | .082     | -.009 – .174   | 1.693    |
| $R^2$ (adjusted $R^2$ ) |          | .082* (.055)    |          |          | .097* (.065)   |          |
| $R^2$ change            |          |                 |          |          | .015           |          |

*Note.* PTA = pure-tone average of 500, 1000, 2000, 4000 Hz in the better ear; MoCA = Montreal Cognitive Assessment; MoCA-Modified, MoCA Hearing. Model 1 (Columns 2–4) included demographic factors and sex and PTA individually. Model 2 (Columns 5–7) included all the aforementioned variables in addition to the interaction term between sex and PTA. Beta values represent unstandardized coefficients, while *t* statistic is the beta coefficient divided by its standard error. The change in  $R^2$  represents the amount of variance that can be contributed to the interaction between sex and hearing after all other variables are considered.
