# Supplementary material
Source: publisher figshare collection journal article supplement (https://asha.figshare.com/articles/dataset/_/19233297)
Supplement: Supplementary file 2 [file 1]

**Supplemental Material S1.** Demographic and cognitive variables for those with normal hearing and hearing loss (based on the cutoff of a 25 dB HL pure-tone average of thresholds at 500, 1000, 2000, and 4000 Hz in the worse ear). Males normal hearing  $n = 25$ , hearing loss  $n = 52$ ; females normal hearing  $n = 67$ , hearing loss  $n = 49$ . Findings are reported as mean (*SD*). Significant differences between participants with normal hearing and hearing loss are noted as  $*p < .05$ .

|                                       |                | Normal hearing | Hearing loss | <i>p</i> | Effect size |
|---------------------------------------|----------------|----------------|--------------|----------|-------------|
| <b>Age (years)</b>                    | <b>Males</b>   | 65.80 (4.54)   | 70.40 (5.31) | < .001*  | .16         |
|                                       | <b>Females</b> | 66.31 (4.13)   | 72.12 (6.23) | < .001*  | .21         |
| <b>Education (years)</b>              | <b>Males</b>   | 16.90 (2.61)   | 16.67 (3.33) | .787     | .001        |
|                                       | <b>Females</b> | 16.56 (2.37)   | 15.87 (3.72) | .270     | .002        |
| <b>Depression (% yes)</b>             | <b>Males</b>   | 10.0           | 10.2         | .980     | .003        |
|                                       | <b>Females</b> | 10.8           | 11.6         | .889     | .013        |
| <b>MoCA score (Max = 30)</b>          | <b>Males</b>   | 26.56 (2.35)   | 26.17 (2.29) | .493     | .006        |
|                                       | <b>Females</b> | 28.00 (1.64)   | 26.67 (2.63) | .003*    | .07         |
| <b>MoCA-Modified score (Max = 20)</b> | <b>Males</b>   | 18.68 (1.65)   | 18.40 (1.46) | .459     | .007        |
|                                       | <b>Females</b> | 19.13 (.95)    | 18.37 (1.90) | .012*    | .05         |

*Note.* PTA = pure-tone average of 500, 1000, 2000, 4000 Hz in the worse ear; MoCA = Montreal Cognitive Assessment; MoCA-Modified, MoCA Hearing. Results for self-reported depression status are from a chi-square analysis and effect sizes reported are Cramer's  $V$ . Due to violation of the homogeneity of variance assumption, Welch's ANOVA procedure was used and  $\omega^2$  effect sizes are reported for the following variables: male age, female age, education, MoCA, and MoCA-Modified scores. For all other variables, a univariate ANOVA was used and effect sizes reported are  $\eta_p^2$ .
